# Supplementary material for: Long-Term Variations in Global Solar Radiation and Its Interaction with Atmospheric Substances at Qomolangma
Source: MDPI journal article supplement (doi:10.3390/ijerph19158906), 2022-07-22
Supplement: s1 [file s1]

## supplementary: list of acronyms and Figure S1

### list of acronyms

|       |                                              |
|-------|----------------------------------------------|
| AAVG  | annual averages                              |
| AF    | attenuation factor                           |
| AOD   | aerosol optical depth                        |
| BC    | black carbon                                 |
| BVOCs | biogenic volatile organic compounds          |
| CERES | Clouds and the Earth's Radiant Energy System |
| CPRs  | chemical and photochemical reactions         |
| GHGs  | greenhouse gases                             |
| GLPs  | gases, liquids, and particles                |
| HAVG  | hourly average                               |
| INEA  | internal energy of the atmosphere            |
| IPCC  | Intergovernmental Panel on Climate Change    |
| MAVG  | monthly average                              |
| NIR   | near infrared radiation                      |
| SOA   | secondary organic aerosols                   |
| TOA   | top of the atmosphere                        |
| UV    | ultraviolet radiation                        |
| VIS   | visible radiation                            |
| VOCs  | volatile organic compounds                   |

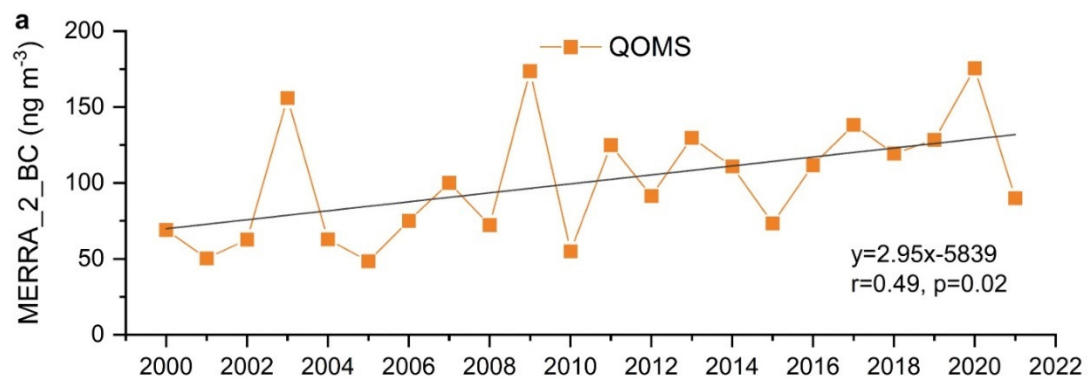

**Figure S1.** Black carbon concentration in 2000-2021 at QOMS station from monthly MERRA-2 data.
